# Supplementary material for: Development of APE1 enzymatic DNA repair assays: low APE1 activity is associated with increase lung cancer risk
Source: PubMed Central journal article supplement — Carcinogenesis. 2015 Jun 4;36(9):982–91. doi: 10.1093/carcin/bgv082 (PMC4552243; doi:10.1093/carcin/bgv082), 2015-06-04
Supplement: supp_bgv082_3_Livneh_APE1_supplm.pdf [file supp_bgv082_3_Livneh_APE1_supplm.pdf]

## Supplementary Material

### To: Development of APE1 enzymatic DNA repair assays: Low APE1 activity is associated with increase lung cancer risk

Ziv Sevilya<sup>1</sup>, et al.... Tamar Paz-Elizur\*<sup>1</sup> and Zvi Livneh\*<sup>1</sup>.

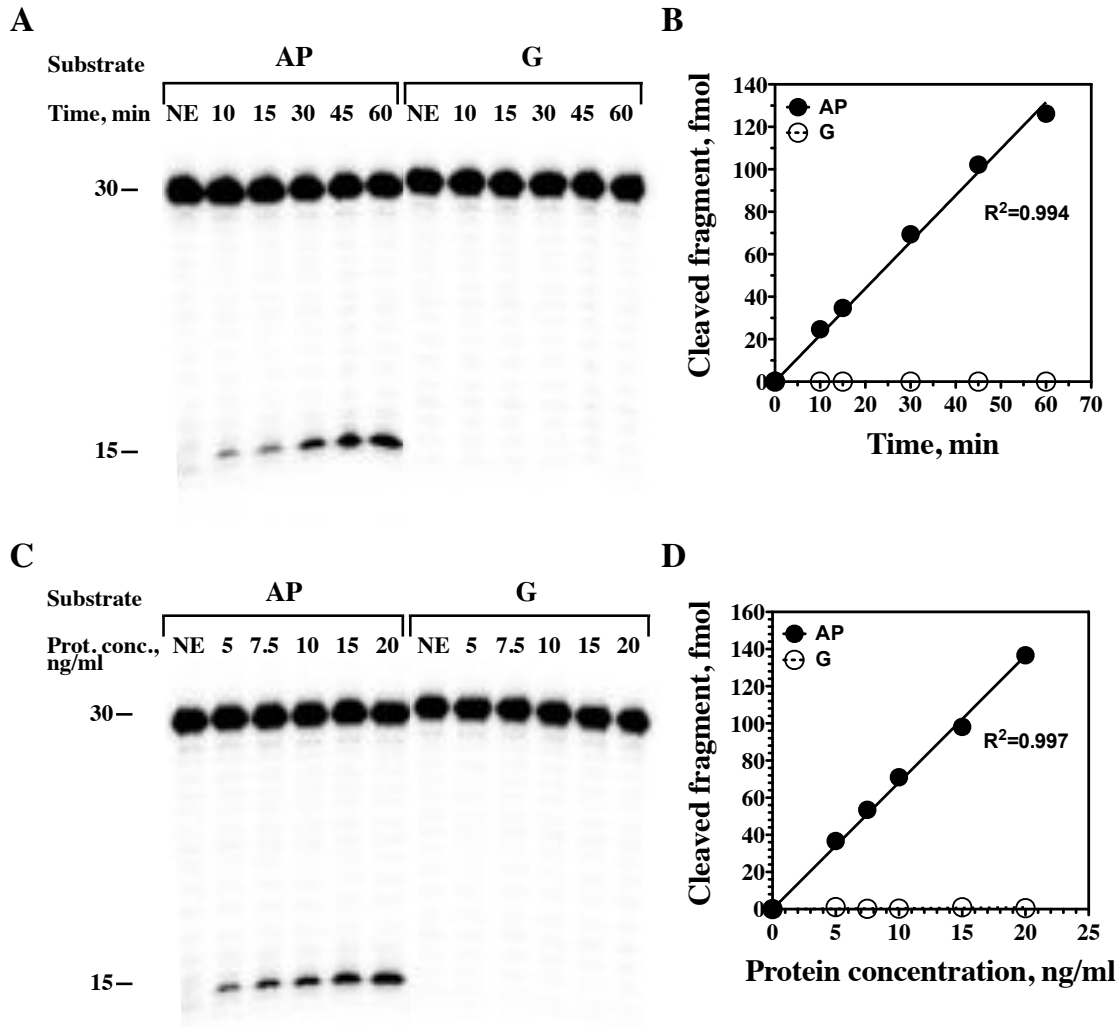

**Supplementary Fig. 1.** Gel electrophoresis images showing fractionation of the products of radioactivity-based APE1 enzyme activity reactions. **(A)** Gel image of the kinetics of APE1 activity under optimized conditions. **(B)** Quantification of the gel presented in A was done by phosphorimaging **(C)** Protein titration of APE1 activity under optimal reaction conditions with a protein extract prepared from PBMC. **(D)** Quantification of the gel presented in C was done by phosphorimaging. In both panels **(A)** and **(C)** the substrate containing the abasic site (AP) was cleaved yielding the 15-mer, whereas the control DNA “G” without the damage was not cleaved. Closed circles, substrates with the abasic site (AP); Open circles, control DNAs without the lesion.

**A**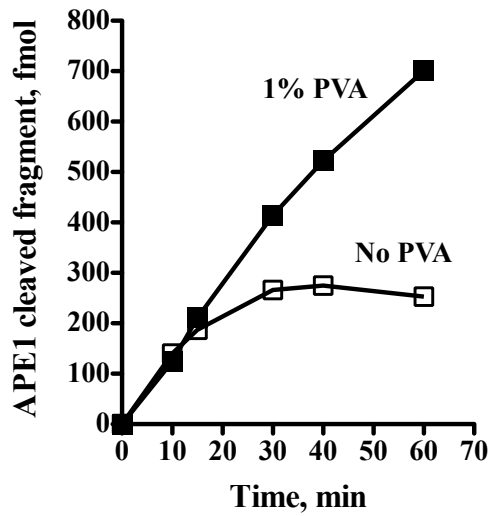**B**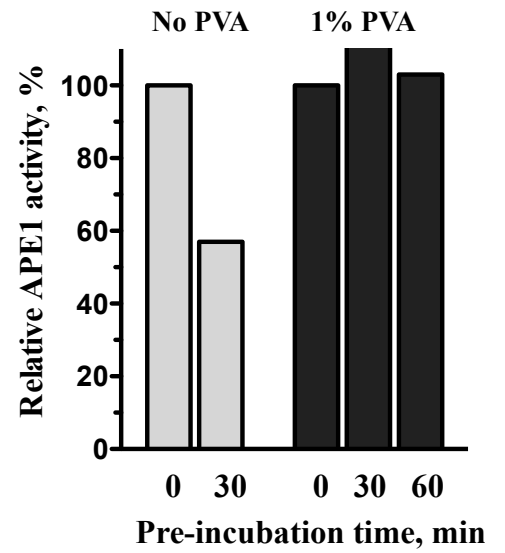

**Supplementary Fig. 2.** Effect of the stabilizing additive polyvinyl alcohol (PVA) on APE1 reaction. **(A)** Time course of the APE1 reaction in the presence (closed squares) or absence (open square) of 1% PVA. **(B)** Effect of pre-incubation of a diluted protein extract prior to its addition to the reaction mixture in the presence (black) or absence (gray) of 1% PVA. APE1 enzyme activity is presented relative to the activity without pre-incubation of the extract (set as 100%).

**Supplementary Table 1.** Analysis of the relationships between APE1 Asp148Glu, APE1 activity (fluorescence-based) and lung cancer risk

| A. Association of APE1 Asp148Glu with lung cancer, and with APE1 activity (fluorescence -based) |                |          |          |            |                                            |                                            |
|-------------------------------------------------------------------------------------------------|----------------|----------|----------|------------|--------------------------------------------|--------------------------------------------|
| Allele                                                                                          |                | Controls | Cases    | Overall    | $\chi^2$ for association with lung cancer* | F-test for association with APE1 activity§ |
| All                                                                                             | n              | 99       | 99       | 198 (100%) |                                            |                                            |
|                                                                                                 | Mean APE1 (SE) | 896 (24) | 787 (18) | 842 (15)   |                                            |                                            |
| T/T                                                                                             | n              | 42       | 34       | 76 (38.4%) |                                            |                                            |
|                                                                                                 | Mean APE1 (SE) | 843 (31) | 763 (35) | 807 (24)   |                                            |                                            |
| T/G                                                                                             | n              | 46       | 50       | 96 (48.5%) | 0.51 (2df)<br>P=0.77                       | 2.62 (2, 97df)<br>P=0.08                   |
|                                                                                                 | Mean APE1 (SE) | 947 (40) | 810 (25) | 876 (24)   |                                            |                                            |
| G/G                                                                                             | n              | 11       | 15       | 26 (13.1%) |                                            |                                            |
|                                                                                                 | Mean APE1 (SE) | 887 (57) | 770 (33) | 819 (32)   |                                            |                                            |
| Trend                                                                                           |                |          |          |            | 0.51 (1df)<br>P=0.48                       | 0.82 (1, 98df)<br>P=0.37                   |

  

| B. Logistic regression analysis of APE1 Asp148Glu and APE1 activity (fluorescence-based) in lung cancer |                              |                             |                             |                             |
|---------------------------------------------------------------------------------------------------------|------------------------------|-----------------------------|-----------------------------|-----------------------------|
| Model                                                                                                   | OR¶<br>APE1<br>(95%CI)       | OR<br>SNP1<br>(95%CI)       | OR<br>SNP2<br>(95%CI)       | OR<br>SNP trend<br>(95%CI)  |
| Smoking + APE1                                                                                          | 1.34 (1.11, 1.61)<br>P=0.002 | -                           | -                           | -                           |
| Smoking + APE1<br>+ SNP1 (wt v htrz)<br>+ SNP2 (wt v homz)                                              | 1.38 (1.14, 1.69)<br>P=0.001 | 1.74 (0.83, 3.65)<br>P=0.32 | 1.54 (0.52, 4.55)<br>P=0.32 | -                           |
| Smoking + APE1<br>+ SNP trend                                                                           | 1.36 (1.12, 1.65)<br>P=0.002 | -                           | -                           | 1.36 (0.82, 2.27)<br>P=0.24 |

\* Test for association between SNP and lung cancer using conditional logistic regression adjusted for smoking: 2 degree of freedom test and test for trend

§ Test for association between SNP and APE1 activity (fluorescence-based assay) using multiple linear regression, controlling for smoking and matched pairs: 2 degree of freedom test and test for trend

¶ Odds ratios are expressed per 100 APE1 units

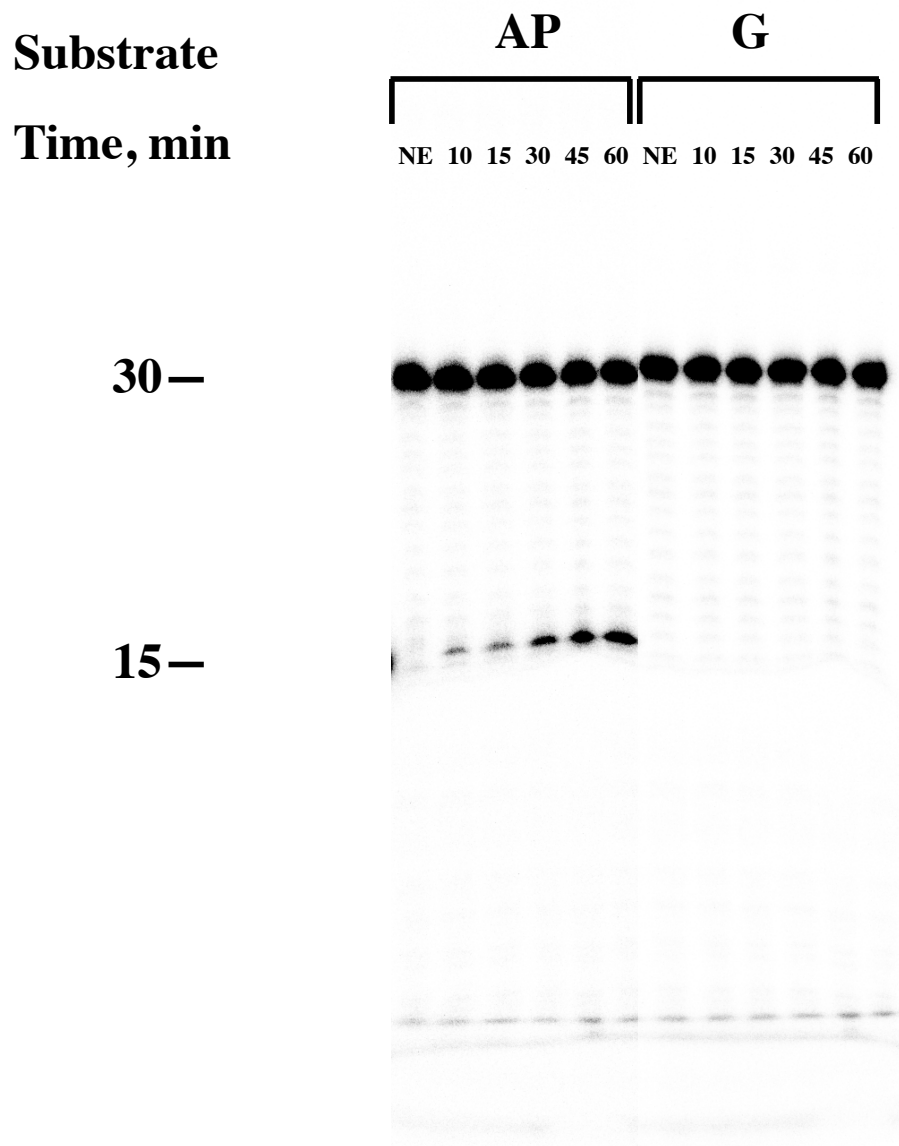

Full gel image of Supplementary Figure 1A

**Substrate**

**AP**

**G**

**Prot. conc.,  
ng/ml**

NE 5 7.5 10 15 20 | NE 5 7.5 10 15 20

30—

15—

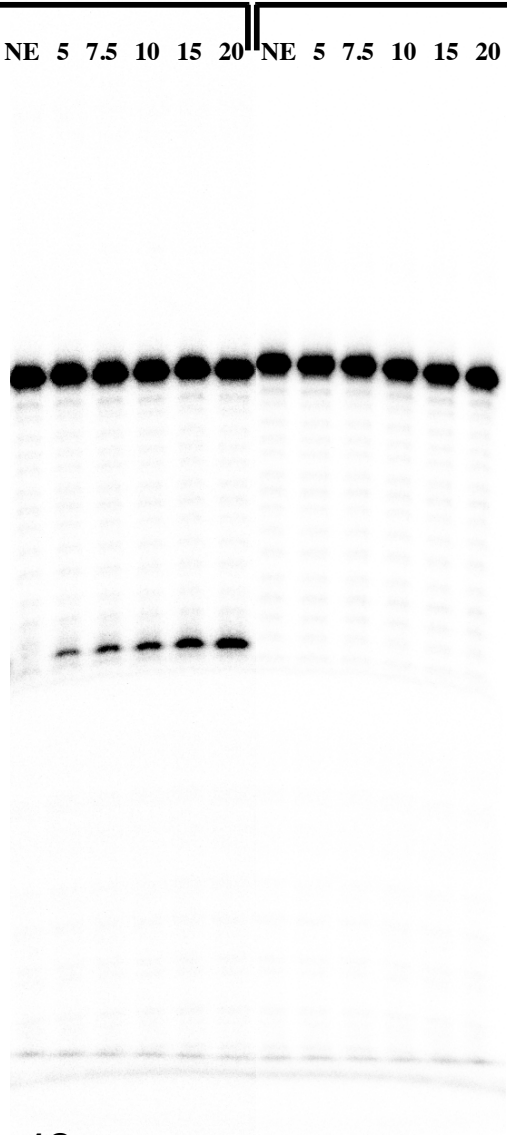

**Full gel image of Supplementary Figure 1C**
